# Supplementary material for: Impacts of Infrastructure Developments on Ecosystem Services Potential in Istanbul
Source: Frontiers journal article supplement (doi:10.3389/fenvs.2021.614752), 2021-05-14
Supplement: Data_Sheet_1.docx [file Data_Sheet_1.docx]

**Appendix-1**

| SPATIAL USE TYPE (CORINE LAND COVER TAXONOMY) | **REGULATING SERVICES** | | | | | | | | **CULTURAL SERVICES** | | | | | | | **PROVISIONING SERVICES** | | | | | | | | | | | | TOTAL ES SCORE |
| --- | --- | --- | --- | --- | --- | --- | --- | --- | --- | --- | --- | --- | --- | --- | --- | --- | --- | --- | --- | --- | --- | --- | --- | --- | --- | --- | --- | --- |
| Mediation of gaseous/air flows | Atmospheric composition and climate regulation | Mediation of liquid flows | Soil formation and composition | Pest and disease control | Natural Hazard Control | Pollination | Mediation of waste, toxins and other nuisances by ecosystems | Cultural Diversity | Ethical Values | Education and Information | Inspiration | Recreation and aesthetics | Intrinsic value of biodiversity | Eco-tourism | Crop | Lıvestock | Provender | Line Fishing | Water Culture | Gathering | Wood | Fiber | Energy/ Biomess | Fresh Water | Genetic Resources | Biochemical and medical products |
| Continuous urban fabric | 0 | 0 | 0 | 0 | 0 | 0 | 0 | 0 | 5 | 4 | 5 | 3 | 3 | 0 | 2 | 0 | 0 | 0 | 0 | 0 | 0 | 0 | 0 | 0 | 0 | 0 | 0 | 22 |
| Discontinuous urban fabric | 0 | 0 | 0 | 0 | 0 | 0 | 0 | 0 | 4 | 4 | 4 | 4 | 4 | 1 | 3 | 0 | 0 | 0 | 0 | 0 | 0 | 0 | 0 | 0 | 0 | 0 | 0 | 24 |
| Industrial or commercial units | 0 | 0 | 0 | 0 | 0 | 0 | 0 | 0 | 0 | 0 | 0 | 0 | 0 | 0 | 0 | 0 | 0 | 0 | 0 | 0 | 0 | 0 | 0 | 0 | 0 | 0 | 0 | 0 |
| Road and rail networks and associated land | 0 | 0 | 0 | 0 | 0 | 0 | 0 | 0 | 0 | 0 | 0 | 0 | 0 | 0 | 0 | 0 | 0 | 0 | 0 | 0 | 0 | 0 | 0 | 0 | 0 | 0 | 0 | 0 |
| Port areas | 0 | 0 | 0 | 0 | 0 | 0 | 0 | 0 | 0 | 0 | 0 | 0 | 0 | 0 | 0 | 0 | 0 | 0 | 0 | 0 | 0 | 0 | 0 | 0 | 0 | 0 | 0 | 0 |
| Airports | 0 | 0 | 0 | 0 | 0 | 0 | 0 | 0 | 0 | 0 | 0 | 0 | 0 | 0 | 0 | 0 | 0 | 0 | 0 | 0 | 0 | 0 | 0 | 0 | 0 | 0 | 0 | 0 |
| Mineral extraction sites | 0 | 0 | 0 | 0 | 0 | 0 | 0 | 0 | 0 | 0 | 0 | 0 | 0 | 0 | 0 | 0 | 0 | 0 | 0 | 0 | 0 | 0 | 0 | 0 | 0 | 0 | 0 | 0 |
| Construction sites | 0 | 0 | 0 | 0 | 0 | 0 | 0 | 0 | 0 | 0 | 0 | 0 | 0 | 0 | 0 | 0 | 0 | 0 | 0 | 0 | 0 | 0 | 0 | 0 | 0 | 0 | 0 | 0 |
| Green urban areas | 1 | 1 | 1 | 0 | 1 | 0 | 1 | 1 | 2 | 3 | 2 | 3 | 4 | 1 | 2 | 0 | 0 | 0 | 0 | 0 | 0 | 0 | 0 | 0 | 0 | 0 | 0 | 23 |
| Sport and leisure facilities | 0 | 0 | 0 | 0 | 0 | 0 | 0 | 0 | 2 | 3 | 2 | 3 | 4 | 0 | 1 |  |  |  |  |  |  |  |  |  |  |  |  | 15 |
| Non-irrigated arable land | 2 | 1 | 2 | 2 | 2 | 3 | 2 | 2 | 3 | 0 | 2 | 1 | 3 | 0 | 3 | 5 | 0 | 5 | 0 | 0 | 1 | 0 | 5 | 5 | 0 | 2 | 3 | 54 |
| Permanently irrigated land | 2 | 3 | 1 | 1 | 2 | 2 | 2 | 2 | 3 | 0 | 2 | 1 | 1 | 0 | 2 | 5 | 0 | 2 | 0 | 0 | 1 | 0 | 4 | 4 | 0 | 2 | 2 | 44 |
| Fruit trees and berry plantations | 2 | 2 | 2 | 2 | 3 | 2 | 5 | 1 | 2 | 1 | 5 | 4 | 4 | 5 | 5 | 4 | 0 | 4 | 0 | 0 | 1 | 0 | 4 | 4 | 0 | 2 | 2 | 66 |
| Pastures | 1 | 1 | 1 | 1 | 2 | 1 | 1 | 1 | 2 | 1 | 5 | 4 | 4 | 5 | 5 | 0 | 5 | 5 | 0 | 0 | 2 | 0 | 0 | 1 | 0 | 2 | 1 | 51 |
| Complex cultivation patterns | 2 | 1 | 2 | 2 | 2 | 3 | 2 | 2 | 5 | 0 | 2 | 2 | 3 | 0 | 3 | 5 | 0 | 0 | 0 | 0 | 1 | 2 | 0 | 1 | 0 | 2 | 2 | 44 |
| Land principally occupied by agriculture, with significant areas of natural vegetation | 2 | 1 | 2 | 2 | 2 | 3 | 2 | 2 | 3 | 0 | 2 | 1 | 3 | 0 | 3 | 4 | 0 | 4 | 0 | 0 | 1 | 0 | 4 | 4 | 0 | 2 | 2 | 49 |
| Broad-leaved forest | 5 | 5 | 4 | 5 | 4 | 4 | 4 | 5 | 4 | 3 | 5 | 5 | 5 | 5 | 5 | 0 | 0 | 1 | 0 | 0 | 5 | 5 | 1 | 1 | 0 | 3 | 3 | 87 |
| Coniferous forest | 5 | 5 | 4 | 5 | 4 | 4 | 4 | 5 | 4 | 3 | 5 | 5 | 5 | 4 | 5 | 0 | 0 | 1 | 0 | 0 | 5 | 5 | 2 | 1 | 0 | 3 | 3 | 87 |
| Mixed forest | 5 | 5 | 4 | 5 | 5 | 4 | 4 | 5 | 4 | 3 | 5 | 5 | 5 | 5 | 5 | 0 | 0 | 1 | 0 | 0 | 5 | 5 | 2 | 1 | 0 | 3 | 3 | 89 |
| Natural grasslands | 1 | 2 | 3 | 3 | 3 | 2 | 2 | 3 | 3 | 1 | 2 | 2 | 2 | 1 | 5 | 0 | 5 | 5 | 0 | 0 | 2 | 0 | 0 | 1 | 0 | 2 | 1 | 51 |
| Transitional woodland-shrub | 1 | 2 | 3 | 3 | 3 | 2 | 2 | 3 | 2 | 3 | 4 | 4 | 5 | 4 | 5 | 0 | 0 | 1 | 0 | 0 | 5 | 2 | 1 | 1 | 0 | 2 | 2 | 60 |
| Beaches, dunes, sands | 0 | 0 | 1 | 1 | 1 | 5 | 0 | 1 | 3 | 1 | 4 | 4 | 5 | 2 | 5 | 0 | 0 | 0 | 0 | 0 | 1 | 0 | 0 | 0 | 0 | 1 | 1 | 36 |
| Sparsely vegetated areas | 1 | 1 | 1 | 1 | 2 | 1 | 1 | 1 |  |  |  |  |  |  |  | 0 | 1 | 1 | 0 | 0 | 5 | 2 | 0 | 1 | 0 | 2 | 1 | 22 |
| Inland marshes | 0 | 3 | 4 | 2 | 3 | 4 | 2 | 4 | 2 | 0 | 3 | 2 | 3 | 4 | 5 | 0 | 2 | 4 | 0 | 0 | 2 | 0 | 0 | 0 | 0 | 0 | 0 | 49 |
| Water courses | 1 | 1 | 3 | 3 | 3 | 3 | 0 | 5 | 3 | 2 | 4 | 4 | 4 | 3 | 4 | 0 | 1 | 0 | 3 | 3 | 4 | 0 | 0 | 3 | 5 | 1 | 1 | 64 |
| Water bodies | 2 | 2 | 5 | 3 | 3 | 3 | 0 | 5 | 3 | 2 | 4 | 4 | 4 | 3 | 4 | 0 | 1 | 0 | 4 | 5 | 4 | 0 | 0 | 1 | 5 | 1 | 1 | 69 |
| Sea and ocean | 1 | 3 | 1 | 0 | 3 | 0 | 0 | 5 | 3 | 2 | 5 | 5 | 4 | 3 | 4 | 0 | 0 | 3 | 5 | 5 | 4 | 0 | 0 | 4 | 0 | 3 | 3 | 66 |

**Appendix-2:** Exchange between spatial use types in 2012-2018 period due to NMM and Istanbul Airport construction

| **Spatial use in 2012** | **Area (ha) in 2012** | **Ratio (2012)** | **Spatial use in 2018** | **Area (ha) in 2018** | **Ratio (2018)** |
| --- | --- | --- | --- | --- | --- |
| Broad-leaved forest | 3150,83 | 36,30% | Construction sites | 2543,02 | 29,30% |
| Industrial or commercial units | 92,76 | 1,07% |
| Mineral extraction sites | 34,24 | 0,39% |
| Road and rail networks and associated land | 470,69 | 5,42% |
| Transitional woodland-shrub | 10,12 | 0,12% |
| Mixed forest | 989,71 | 11,40% | Construction sites | 838,59 | 9,66% |
| Industrial or commercial units | 6,9 | 0,08% |
| Mineral extraction sites | 20,46 | 0,24% |
| Road and rail networks and associated land | 112,68 | 1,30% |
| Transitional woodland-shrub | 11,08 | 0,13% |
| Coniferous forest | 580,82 | 6,69% | Construction sites | 368,9 | 4,25% |
| Industrial or commercial units | 10,47 | 0,12% |
| Mineral extraction sites | 102,62 | 1,18% |
| Road and rail networks and associated land | 98,83 | 1,14% |
| Transitional woodland-shrub | 1182,10 | 13,62% | Construction sites | 1076,64 | 12,40% |
| Mineral extraction sites | 36,53 | 0,42% |
| Road and rail networks and associated land | 68,93 | 0,79% |
| Natural grasslands | 874,71 | 10,08% | Construction sites | 680,84 | 7,84% |
| Industrial or commercial units | 80,47 | 0,93% |
| Mineral extraction sites | 113,4 | 1,31% |
| Pastures | 480,99 | 5,54% | Construction sites | 353,31 | 4,07% |
| Industrial or commercial units | 4,95 | 0,06% |
| Mineral extraction sites | 10,47 | 0,12% |
| Road and rail networks and associated land | 112,25 | 1,29% |
| Sparsely vegetated areas | 26,45 | 0,30% | Mineral extraction sites | 26,45 | 0,30% |
| Non-irrigated arable land | 294,84 | 3,40% | Road and rail networks and associated land | 23,2 | 0,27% |
| Construction sites | 271,64 | 3,13% |
| Land principally occupied by agriculture, with significant areas of natural vegetation | 143,29 | 1,65% | Road and rail networks and associated land | 7,87 | 0,09% |
| Construction sites | 135,42 | 1,56% |
| Complex cultivation patterns | 294,54 | 3,39% | Construction sites | 79,45 | 0,92% |
| Road and rail networks and associated land | 215,09 | 2,48% |
| Green urban areas | 4,71 | 0,05% | Construction sites | 4,71 | 0,05% |
| Sea and ocean | 0,58 | 0,01% | Construction sites | 0,27 | 0,00% |
| Sparsely vegetated areas | 0,31 | 0,00% |
| Water bodies | 212,04 | 2,44% | Construction sites | 156,50 | 1,80% |
| Industrial or commercial units | 6,18 | 0,07% |
| Natural grasslands | 49,36 | 0,57% |
| Coastal lagoons | 60,61 | 0,70% | Mineral extraction sites | 60,61 | 0,70% |
| Construction sites | 82,97 | 0,96% | Industrial or commercial units | 55,56 | 0,64% |
| Road and rail networks and associated land | 27,41 | 0,32% |
| Discontinuous urban fabric | 15,92 | 0,18% | Road and rail networks and associated land | 15,92 | 0,18% |
| Dump sites | 9,43 | 0,11% | Construction sites | 9,43 | 0,11% |
| Industrial or commercial units | 91,00 | 1,05% | Road and rail networks and associated land | 6,54 | 0,08% |
| Construction sites | 84,46 | 0,97% |
| Mineral extraction sites | 183,83 | 2,12% | Construction sites | 167,14 | 1,93% |
| Industrial or commercial units | 3,82 | 0,04% |
| Road and rail networks and associated land | 12,87 | 0,15% |

**Appendix-3:**

| **Spatial use in 2012** | **ES SCORE (2012)** | **Spatial use in 2018** | **ES SCORE (2018)** | **AREA (ha)** | **ES POTENTIAL (2012)** | **ES POTENTIAL (2018)** | **LOSS of ES POTENTIAL (2012-2018)** |
| --- | --- | --- | --- | --- | --- | --- | --- |
| Broad-leaved forest | 87 | Road and rail networks and associated land | 0 | 470,69 | 40950,03 | 0,00 | 40950,03 |
| Broad-leaved forest | 87 | Mineral extraction sites | 0 | 34,24 | 2978,88 | 0,00 | 2978,88 |
| Broad-leaved forest | 87 | Construction sites | 0 | 2543,02 | 221242,74 | 0,00 | 221242,74 |
| Broad-leaved forest | 87 | Transitional woodland-shrub | 60 | 10,12 | 880,44 | 607,20 | 273,24 |
| Broad-leaved forest | 87 | Industrial or commercial units | 0 | 92,76 | 8070,17 | 0,00 | 8070,17 |
| Coastal lagoons | 69 | Mineral extraction sites | 0 | 60,61 | 4181,80 | 0,00 | 4181,80 |
| Complex cultivation patterns | 44 | Road and rail networks and associated land | 0 | 215,09 | 9463,96 | 0,00 | 9463,96 |
| Complex cultivation patterns | 44 | Construction sites | 0 | 79,45 | 3495,80 | 0,00 | 3495,80 |
| Coniferous forest | 87 | Industrial or commercial units | 0 | 10,47 | 910,89 | 0,00 | 910,89 |
| Coniferous forest | 87 | Road and rail networks and associated land | 0 | 98,83 | 8598,21 | 0,00 | 8598,21 |
| Coniferous forest | 87 | Construction sites | 0 | 368,9 | 32094,30 | 0,00 | 32094,30 |
| Coniferous forest | 87 | Mineral extraction sites | 0 | 102,62 | 8927,97 | 0,00 | 8927,97 |
| Construction sites | 0 | Industrial or commercial units | 0 | 55,56 | 0,00 | 0,00 | 0,00 |
| Construction sites | 0 | Road and rail networks and associated land | 0 | 27,41 | 0,00 | 0,00 | 0,00 |
| Discontinuous urban fabric | 24 | Road and rail networks and associated land | 0 | 15,92 | 382,08 | 0,00 | 382,08 |
| Dump sites | 0 | Construction sites | 0 | 9,43 | 0,00 | 0,00 | 0,00 |
| Green urban areas | 23 | Construction sites | 0 | 4,71 | 108,33 | 0,00 | 108,33 |
| Industrial or commercial units | 0 | Road and rail networks and associated land | 0 | 6,54 | 0,00 | 0,00 | 0,00 |
| Industrial or commercial units | 0 | Construction sites | 0 | 84,46 | 0,00 | 0,00 | 0,00 |
| Land principally occupied by agriculture, with significant areas of natural vegetation | 49 | Road and rail networks and associated land | 0 | 7,87 | 385,63 | 0,00 | 385,63 |
| Land principally occupied by agriculture, with significant areas of natural vegetation | 49 | Construction sites | 0 | 135,42 | 6635,58 | 0,00 | 6635,58 |
| Mineral extraction sites | 0 | Construction sites | 0 | 167,14 | 0,00 | 0,00 | 0,00 |
| Mineral extraction sites | 0 | Industrial or commercial units | **0** | 3,82 | 0,00 | 0,00 | 0,00 |
| Mineral extraction sites | 0 | Road and rail networks and associated land | 0 | 12,87 | 0,00 | 0,00 | 0,00 |
| Mixed forest | 89 | Industrial or commercial units | 0 | 6,9 | 614,10 | 0,00 | 614,10 |
| Mixed forest | 89 | Road and rail networks and associated land | 0 | 112,68 | 10028,52 | 0,00 | 10028,52 |
| Mixed forest | 89 | Mineral extraction sites | 0 | 20,46 | 1820,94 | 0,00 | 1820,94 |
| Mixed forest | 89 | Construction sites | 0 | 838,59 | 74634,51 | 0,00 | 74634,51 |
| Mixed forest | 89 | Transitional woodland-shrub | 60 | 11,08 | 986,12 | 664,80 | 321,32 |
| Natural grasslands | 51 | Mineral extraction sites | 0 | 113,4 | 5783,40 | 0,00 | 5783,40 |
| Natural grasslands | 51 | Construction sites | 0 | 680,84 | 34722,84 | 0,00 | 34722,84 |
| Natural grasslands | 51 | Industrial or commercial units | 0 | 80,47 | 4103,83 | 0,00 | 4103,83 |
| Non-irrigated arable land | 54 | Road and rail networks and associated land | 0 | 23,2 | 1252,80 | 0,00 | 1252,80 |
| Non-irrigated arable land | 54 | Construction sites | 0 | 271,64 | 14668,56 | 0,00 | 14668,56 |
| Pastures | 51 | Road and rail networks and associated land | 0 | 112,25 | 5724,75 | 0,00 | 5724,75 |
| Pastures | 51 | Construction sites | 0 | 297,75 | 15185,25 | 0,00 | 15185,25 |
| Pastures | 51 | Industrial or commercial units | 0 | 4,95 | 252,55 | 0,00 | 252,55 |
| Pastures | 51 | Mineral extraction sites | 0 | 10,47 | 534,19 | 0,00 | 534,19 |
| Pastures | 51 | Construction sites | 0 | 55,56 | 2833,72 | 0,00 | 2833,72 |
| Sea and ocean | 66 | Construction sites | 0 | 0,27 | 17,87 | 0,00 | 17,87 |
| Sea and ocean | 66 | Sparsely vegetated areas | 22 | 0,31 | 20,71 | 6,90 | 13,81 |
| Sparsely vegetated areas | 22 | Mineral extraction sites | 0 | 26,45 | 581,90 | 0,00 | 581,90 |
| Transitional woodland-shrub | 60 | Road and rail networks and associated land | 0 | 68,93 | 4135,80 | 0,00 | 4135,80 |
| Transitional woodland-shrub | 60 | Mineral extraction sites | 0 | 36,53 | 2191,80 | 0,00 | 2191,80 |
| Transitional woodland-shrub | 60 | Construction sites | 0 | 1076,64 | 64598,40 | 0,00 | 64598,40 |
| Water bodies | 69 | Industrial or commercial units | 0 | 6,18 | 426,40 | 0,00 | 426,40 |
| Water bodies | 69 | Construction sites | 0 | 156,50 | 10798,54 | 0,00 | 10798,54 |
| Water bodies | 69 | Natural grasslands | 51 | 49,36 | 3405,59 | 2517,18 | 888,41 |
|  |  |  |  | TOTAL: | 608629,90 | 3796,08 | 604833,82 |

**Appendıx-4**

|  | CANAL ISTANBUL’S SPATIAL PLAN USE TYPES | | | | | | | | | | | | | | | | | | | | | | | | | | | | | | | |
| --- | --- | --- | --- | --- | --- | --- | --- | --- | --- | --- | --- | --- | --- | --- | --- | --- | --- | --- | --- | --- | --- | --- | --- | --- | --- | --- | --- | --- | --- | --- | --- | --- |
| CLC 2018 Taxonomy  ↓ | Afforestation area | Commercial area | Commercial-residential area | Commercial-tourism area | Cultural facility area | Education area | Fair area | Forest area | Fuel-oil station area | Health facility area | Highway zone | Logistic facility area | Low-density residential area | Market place | Mid-density residential area | Municipal service area | Park and recreation area | Public service area | Railway zone | Social facility area | Special education area | Special health facility area | Special project area | Special social facility area | Sport facility | Technical infrastructure area | Technology development zone | Urban business area | University area | Water body | Worship area | TOTAL |
| Beaches, dunes, sands |  |  |  |  |  |  |  |  |  |  |  |  |  |  |  |  | 1,38 |  |  |  |  |  |  |  |  |  |  |  |  | 3,55 |  | 4,93 |
| Broad-leaved forest |  |  | 5,96 | 0,02 | 0,06 | 2,06 |  | 80,81 |  | 0,33 |  |  | 18,19 |  |  | 0,36 | 9,31 |  |  |  | 0,12 |  |  | 1,3 |  | 3,03 | 0,38 |  |  | 5,37 | 0,19 | 127,49 |
| Complex cultivation patterns | 4,87 | 1,38 | 23,65 |  | 0,01 | 12,75 | 13,14 | 1,84 |  | 1,48 | 19,57 | 17,83 | 117,3 |  |  | 1,01 | 83,35 | 1,84 |  | 0,21 | 0,53 | 1,4 |  |  | 0,32 | 0,34 | 173,43 |  | 1,04 | 69,05 | 0,98 | 547,32 |
| Construction sites | 0,06 |  |  |  |  | 0,02 |  | 13,15 |  |  |  |  |  |  |  |  | 0,11 |  |  |  |  |  |  |  |  |  | 0,02 |  | 0,26 |  |  | 13,62 |
| Coniferous forest |  |  |  |  |  |  |  | 4,18 |  |  |  |  |  |  |  |  | 0 |  |  |  |  |  |  |  |  |  |  |  |  | 0,02 |  | 4,2 |
| Discontinuous urban fabric | 5 | 8,45 | 13,8 | 18,51 | 0,33 | 10,31 |  | 0,31 |  | 1,29 | 0,01 | 45,8 | 139,46 |  | 13,64 |  | 54,78 | 0,62 | 6,01 | 0,48 |  | 0,67 |  |  | 0,45 | 0,53 | 0,72 |  |  | 21,57 | 1,79 | 344,53 |
| Industrial or commercial units |  |  |  |  |  |  |  |  |  |  |  |  | 0,42 |  |  |  | 0,95 |  |  |  |  |  |  |  |  |  |  |  |  |  |  | 1,37 |
| Land principally occupied by agriculture, with significant areas of natural vegetation |  | 40,04 | 107,91 |  | 2,18 | 33,46 | 41,39 | 122,58 | 1,01 | 13,79 | 44,66 | 9,14 | 434,84 | 0,77 | 97,1 | 4,3 | 283,79 | 4,71 | 6,32 | 1,8 | 4,81 | 4,52 | 92,81 | 0,01 | 2,05 | 19,42 | 44,76 |  | 9,47 | 118,85 | 4,26 | 1550,75 |
| Mineral extraction sites |  |  |  |  |  |  |  |  |  |  |  |  |  |  |  |  | 52,4 |  |  |  |  |  |  |  |  |  |  |  |  |  |  | 52,4 |
| Mixed forest |  |  |  |  |  |  | 0,21 | 28,02 |  |  | 0,11 |  |  |  |  |  | 0,7 |  |  |  |  |  |  |  |  |  |  |  |  |  |  | 29,04 |
| Natural grasslands |  |  |  |  |  |  |  | 23,19 |  |  |  | 0,02 |  |  |  |  | 0,11 |  |  |  |  |  |  |  |  |  |  |  |  | 2,74 |  | 26,06 |
| Non-irrigated arable land | 27,83 | 250,67 | 793,91 | 119,26 | 24,14 | 236,99 | 72,85 | 73,11 | 5,28 | 52,61 | 153,42 | 64,89 | 2293,42 |  | 731,51 | 18,41 | 982,52 | 30,94 | 11,71 | 24,5 | 22,42 | 27,49 | 22,98 | 15,51 | 8,59 | 48,74 |  | 12,93 | 27,69 | 522,31 | 29,86 | 6706,49 |
| Pastures |  | 36,88 | 87,46 |  | 1,79 | 25,28 | 13,21 | 10,64 | 0,64 | 3,23 | 8,89 | 21,1 | 205,26 |  | 3,85 | 0,03 | 115,8 | 4,85 |  | 2,03 | 1,56 | 0,65 |  | 2,82 |  |  | 3,88 |  |  | 218,25 | 2,65 | 770,75 |
| Transitional woodland-shrub |  | 3,28 | 29,25 |  | 0,69 | 1,88 |  | 43,74 |  | 1,54 |  |  | 33,59 |  |  | 0,63 | 26,59 | 0,97 |  | 0,28 | 0,71 |  |  |  | 5,44 |  |  |  |  | 21,64 | 1,3 | 171,53 |
| Water Bodies |  |  |  |  |  | 0,48 |  |  |  |  |  |  | 10,26 |  | 22,66 |  | 258,38 |  | 1,15 |  |  |  |  |  |  | 0,43 |  |  |  | 479,62 |  | 772,98 |
| **TOTAL** | 37,76 | 340,7 | 1061,94 | 137,79 | 29,2 | 323,23 | 140,8 | 401,57 | 6,93 | 74,27 | 226,66 | 158,78 | 3252,74 | 0,77 | 868,76 | 24,74 | 1870,17 | 43,93 | 25,19 | 29,3 | 30,15 | 34,73 | 115,79 | 19,64 | 16,85 | 72,49 | 223,19 | 12,93 | 38,46 | 1462,97 | 41,03 | 11123,46 |
